# Supplementary material for: Sensitivity of atmospheric forcing on Northern Hemisphere ice sheets during the last glacial-interglacial cycle using output from PMIP3
Source: Copernicus journal article supplement (doi:10.5194/cp-2017-105), 2017-08-30
Supplement: Supplementary file 1 [file cp-2017-105-supplement.pdf]

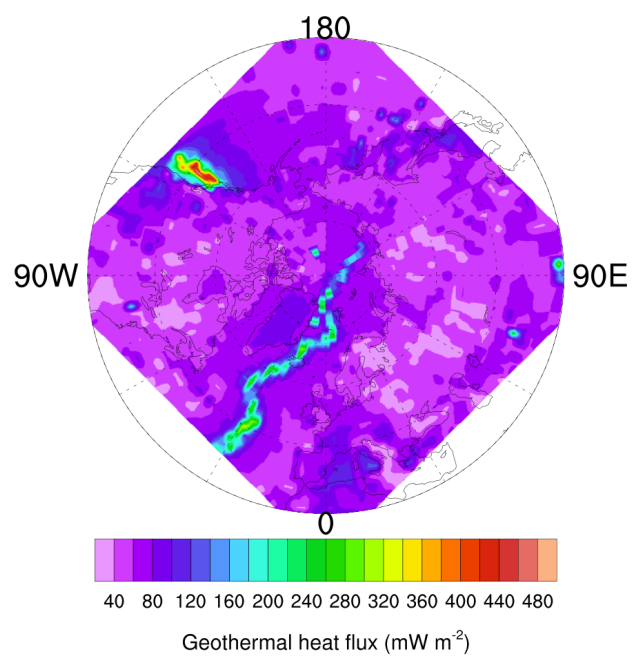

**Figure S1.** Geothermal heat flux data from Davies (2013).

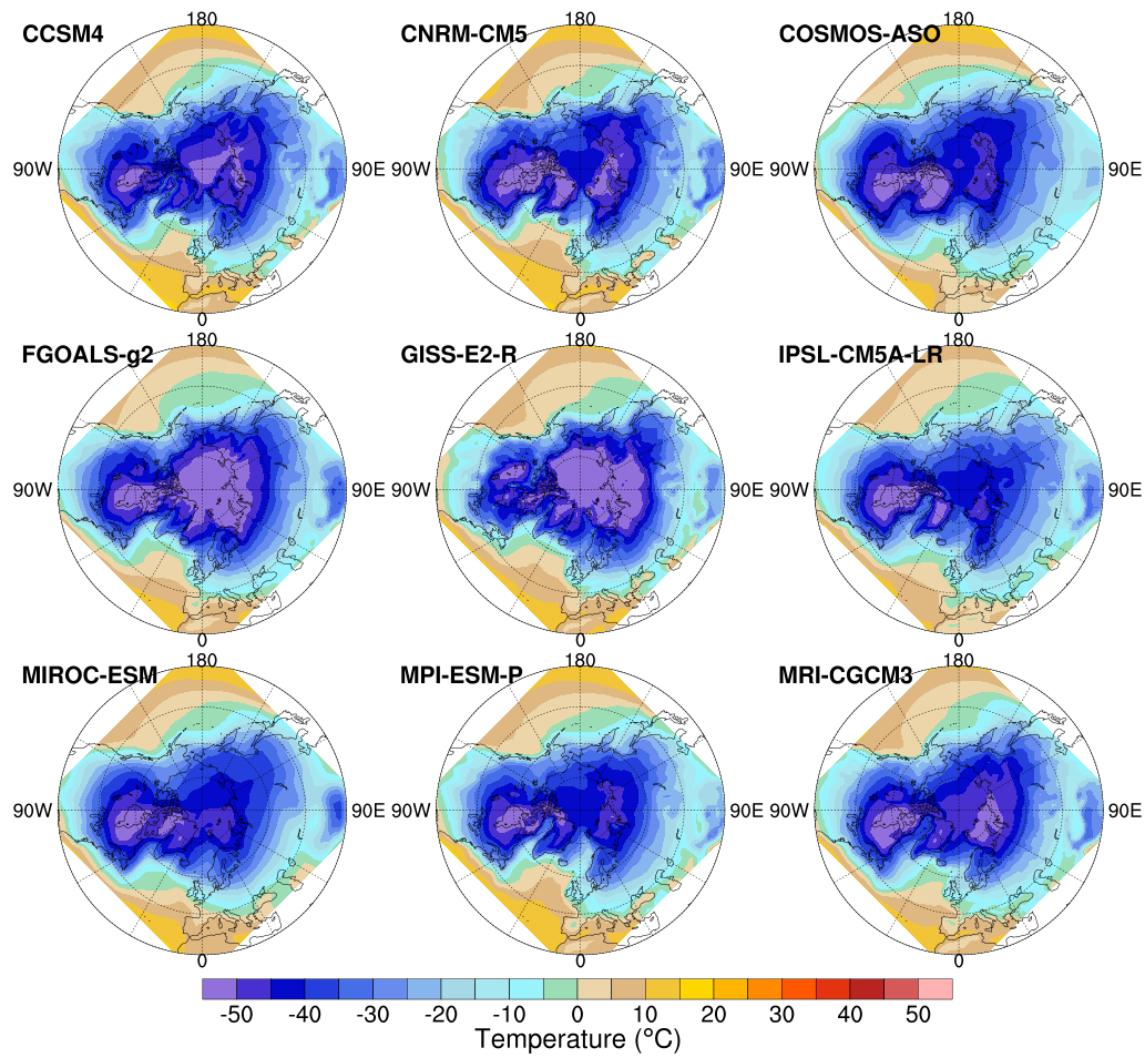

**Figure S2.** The surface air temperature (SAT) at the Last Glacial Maximum (LGM) in boreal winter (DJF) in different models participating in PMIP3.

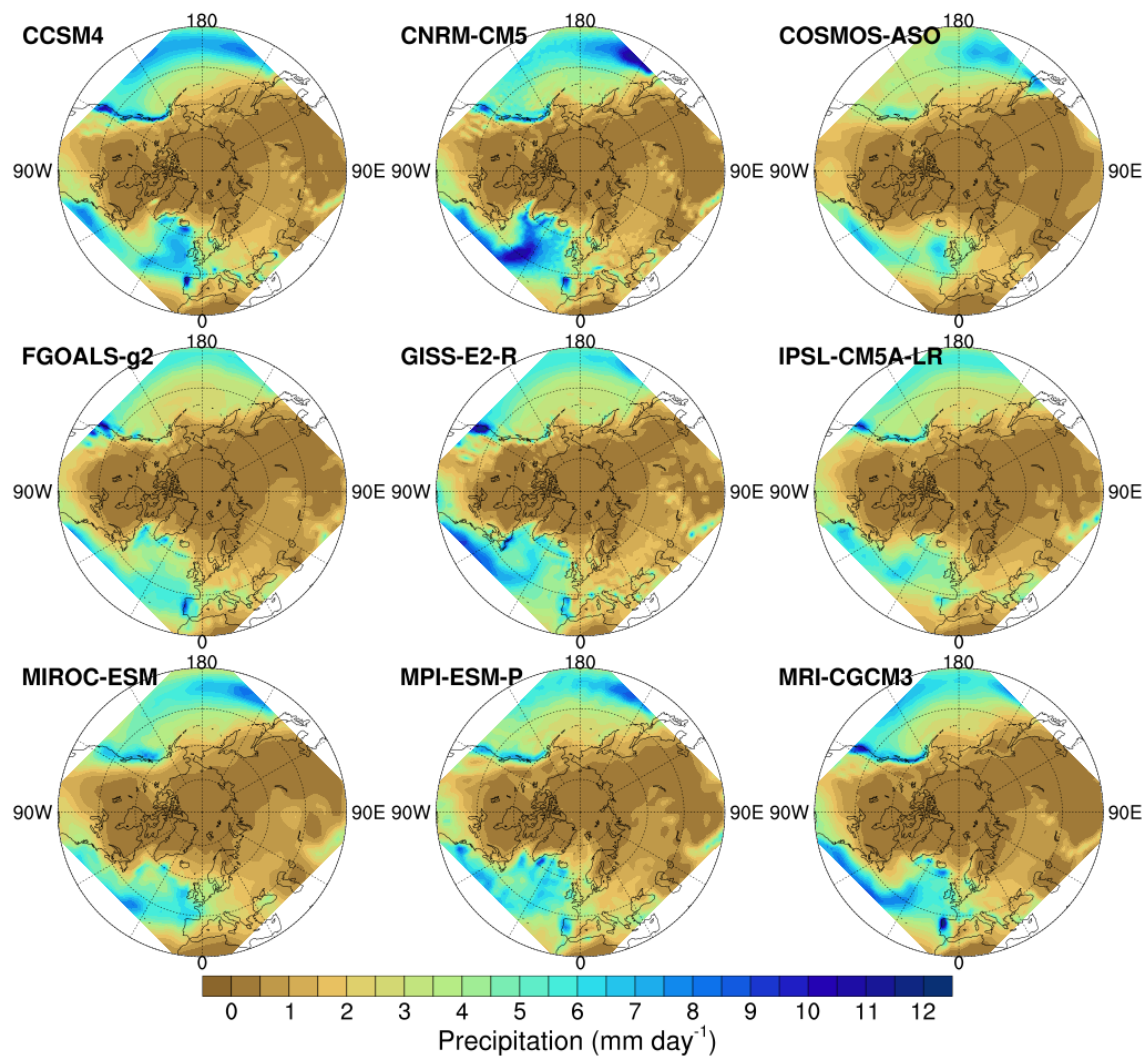

**Figure S3.** Same as Fig. S2, but for precipitation.

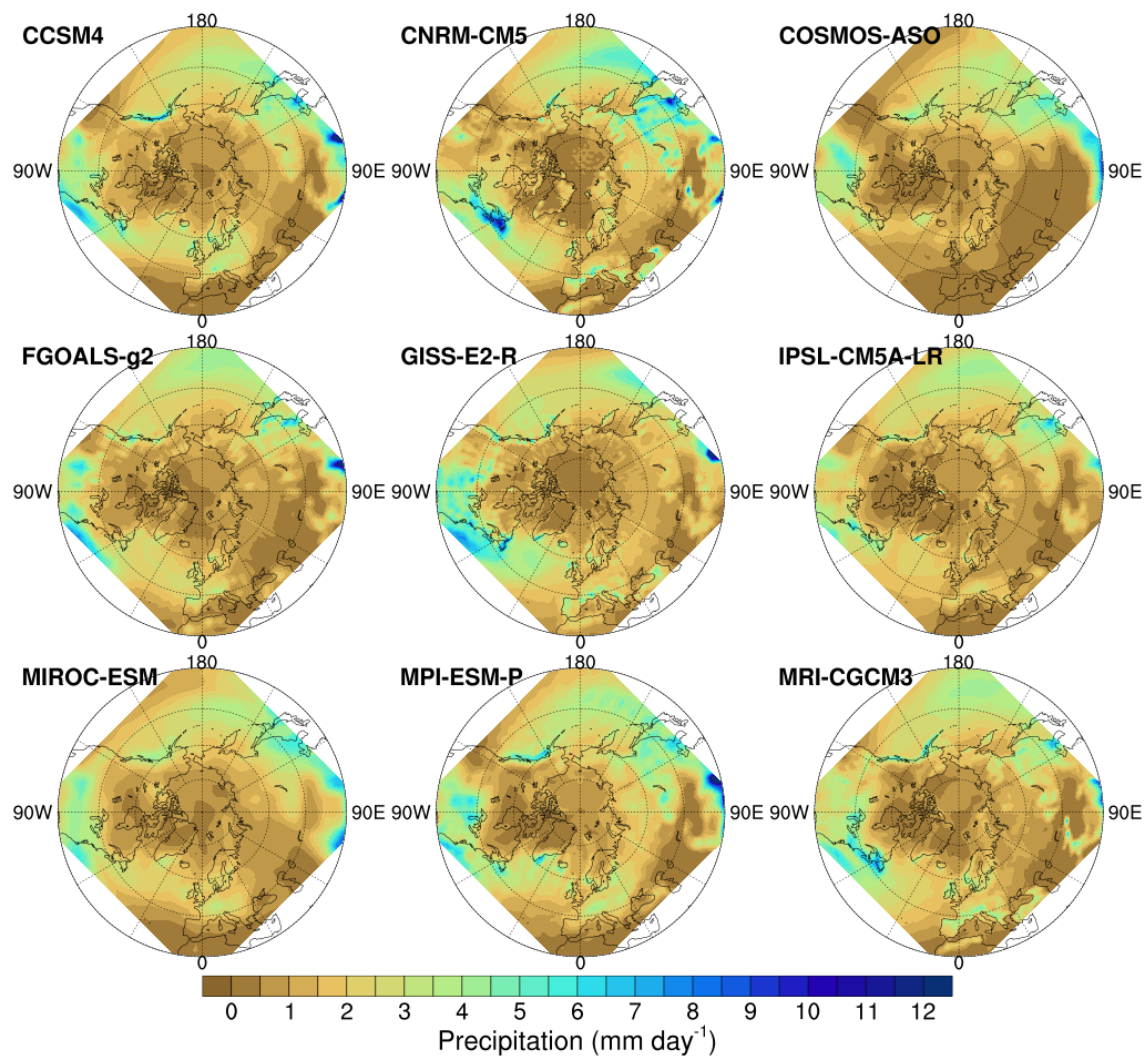

**Figure S4.** Same as Fig. S3, but for boreal summer (JJA).

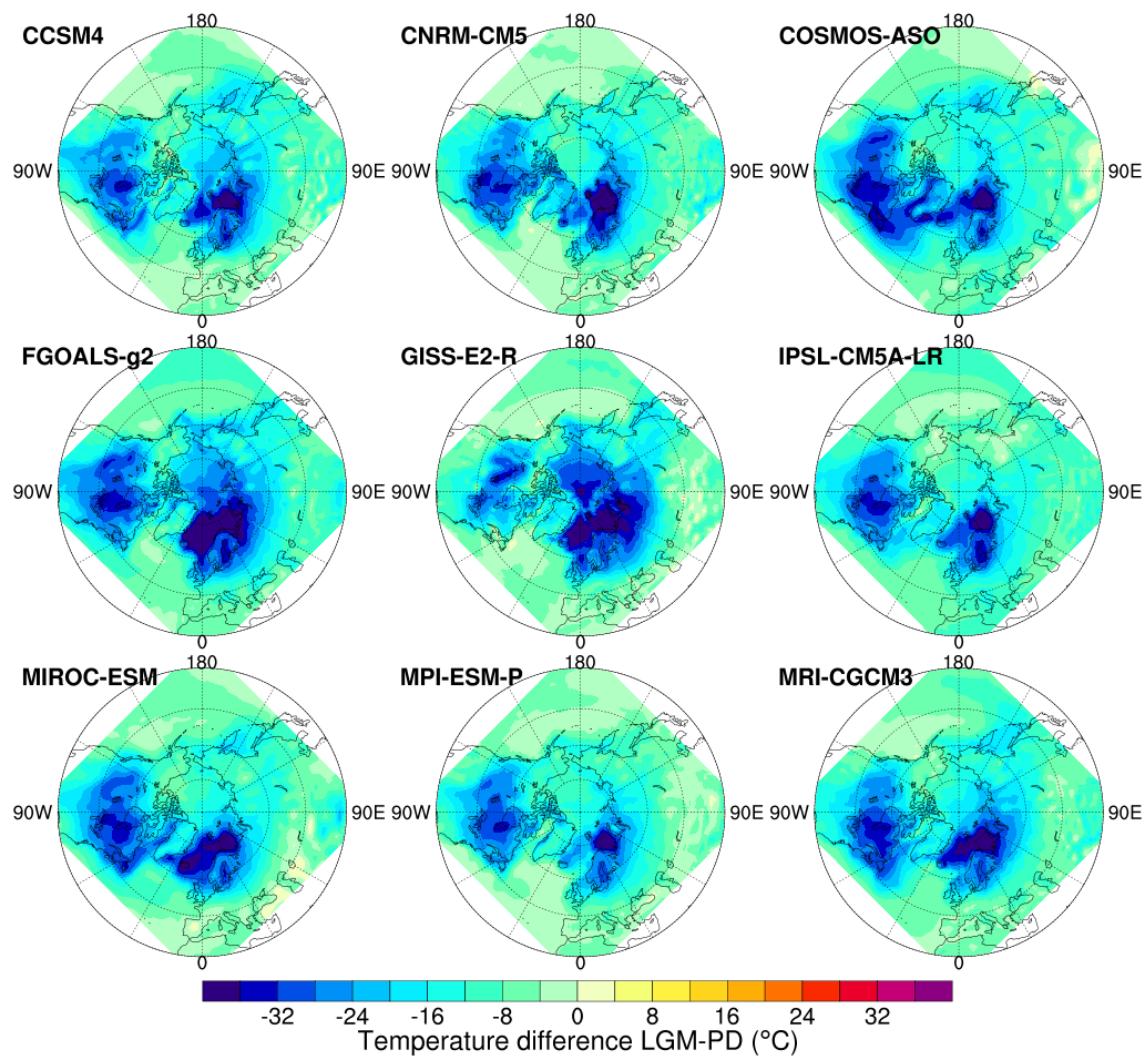

**Figure S5.** The surface air temperature (SAT) difference between Last Glacial Maximum (LGM) and Present Day (PD) in winter (DJF) in different models participating in PMIP3 (LGM minus PD).



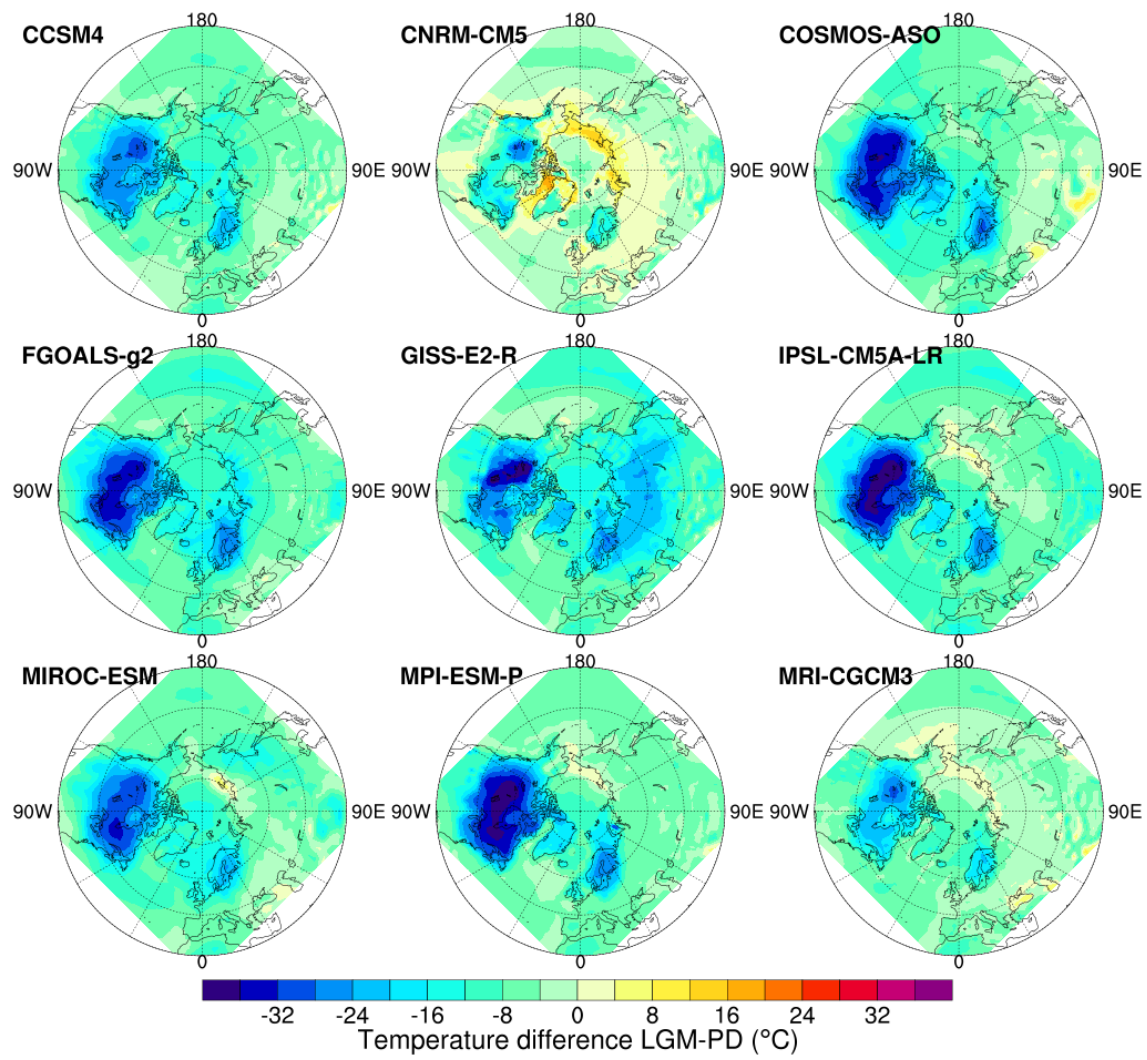

**Figure S6.** Same as Fig. S5, but for boreal summer (JJA).

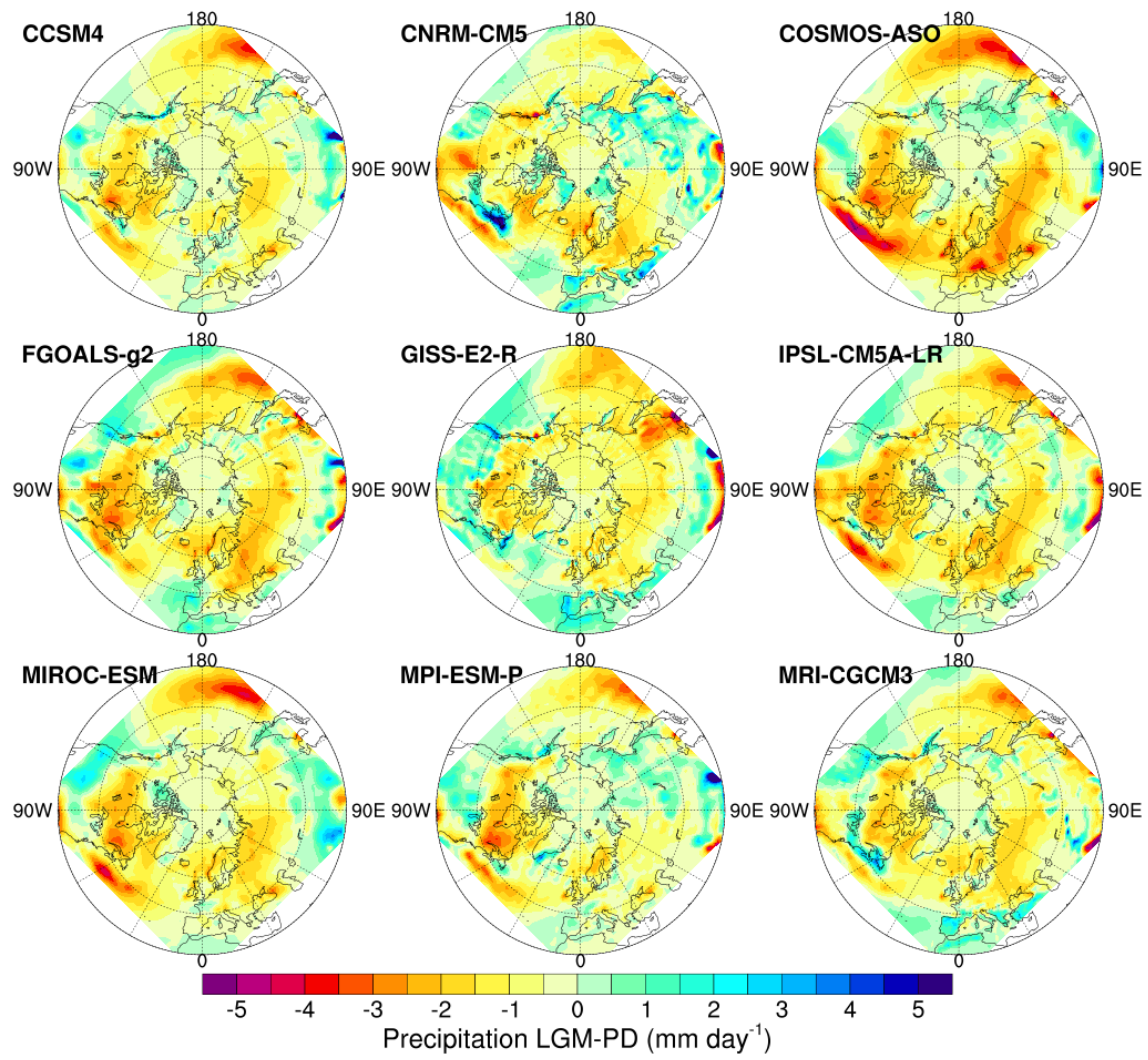

**Figure S7.** Same as Fig. S6, but for precipitation.
